# Supplementary material
Source: HighWire-hosted journal article supplement (https://bmjopensem.bmj.com/content/4/1/e000335)
Supplement: inline-supplementary-material-1 [file inline-supplementary-material-1.docx]

**Table 1** Supplement: Incidence of positive spine MRIs in athletes less than 20, 20-29 and >30 years old by sport

| **Sport** | **Total athletes** | | | **Athletes receiving spine MRIs** | | | **Positive spine MRIs** | | | **Frequency**  **(positive MRIs/**  **athletes receiving spine MRIs) (%)** | | | **Incidence**  **(positive MRIs/**  **total athletes x 100)** | | |
| --- | --- | --- | --- | --- | --- | --- | --- | --- | --- | --- | --- | --- | --- | --- | --- |
| **Age** | **<20** | **20-29** | ≥**30** | **<20** | **20-29** | ≥**30** | **<20** | **20-29** | ≥**30** | **<20** | **20-29** | ≥**30** | **<20** | **20-29** | ≥**30** |
| Aquatics – Diving | 23 | 95 | 17 | 0 | 5 | 1 | 0 | 3 | 1 | 0 | 60 | 100 | 0.0 | 3.2 | 5.9 |
| Aquatics - Swimming | 182 | 674 | 45 | 1 | 3 | 0 | 0 | 2 | 0 | 0 | 67 | 0 | 0.0 | 0.3 | 0.0 |
| Aquatics - Water Polo | 11 | 177 | 70 | 0 | 0 | 1 | 0 | 0 | 1 | 0 | 0 | 100 | 0.0 | 0.0 | 1.4 |
| Archery | 11 | 89 | 28 | 0 | 1 | 0 | 0 | 1 | 0 | 0 | 100 | 0 | 0.0 | 1.1 | 0.0 |
| Athletics | 88 | 1657 | 622 | 1 | 21 | 9 | 0 | 10 | 5 | 0 | 48 | 56 | 0.0 | 0.6 | 0.8 |
| Badminton | 2 | 119 | 51 | 0 | 1 | 0 | 0 | 0 | 0 | 0 | 0 | 0 | 0.0 | 0.0 | 0.0 |
| Beach Volleyball | 1 | 57 | 38 | 0 | 1 | 0 | 0 | 0 | 0 | 0 | 0 | 0 | 0.0 | 0.0 | 0.0 |
| Boxing | 13 | 232 | 41 | 0 | 2 | 2 | 0 | 0 | 1 | 0 | 0 | 50 | 0.0 | 0.0 | 2.4 |
| Canoe – Sprint | 5 | 166 | 77 | 0 | 0 | 1 | 0 | 0 | 0 | 0 | 0 | 0 | 0.0 | 0.0 | 0.0 |
| Cycling – MTB | 1 | 43 | 36 | 0 | 1 | 0 | 0 | 1 | 0 | 0 | 100 | 0 | 0.0 | 2.3 | 0.0 |
| Equestrian | 1 | 39 | 160 | 0 | 1 | 0 | 0 | 0 | 0 | 0 | 0 | 0 | 0.0 | 0.0 | 0.0 |
| Fencing | 9 | 122 | 73 | 0 | 0 | 2 | 0 | 0 | 1 | 0 | 0 | 50 | 0.0 | 0.0 | 1.4 |
| Football | 20 | 440 | 43 | 0 | 2 | 0 | 0 | 1 | 0 | 0 | 50 | 0 | 0.0 | 0.2 | 0.0 |
| Gymnastics | 98 | 198 | 26 | 3 | 3 | 0 | 0 | 1 | 0 | 0 | 33 | 0 | 0.0 | 0.5 | 0.0 |
| Handball | 1 | 205 | 129 | 0 | 0 | 2 | 0 | 0 | 2 | 0 | 0 | 100 | 0.0 | 0.0 | 1.6 |
| Hockey | 10 | 289 | 85 | 0 | 1 | 2 | 0 | 1 | 1 | 0 | 100 | 50 | 0.0 | 0.4 | 1.2 |
| Judo | 4 | 302 | 84 | 0 | 4 | 4 | 0 | 2 | 3 | 0 | 50 | 75 | 0.0 | 0.7 | 3.6 |
| Rowing | 9 | 385 | 152 | 0 | 2 | 1 | 0 | 0 | 1 | 0 | 0 | 100 | 0.0 | 0.0 | 0.7 |
| Rugby | 6 | 224 | 61 | 0 | 0 | 1 | 0 | 0 | 1 | 0 | 0 | 100 | 0.0 | 0.0 | 1.6 |
| Sailing | 12 | 244 | 124 | 0 | 1 | 1 | 0 | 1 | 1 | 0 | 100 | 100 | 0.0 | 0.4 | 0.8 |
| Shooting | 19 | 154 | 217 | 0 | 0 | 3 | 0 | 0 | 1 | 0 | 0 | 33 | 0.0 | 0.0 | 0.5 |
| Table tennis | 9 | 99 | 64 | 0 | 0 | 2 | 0 | 0 | 1 | 0 | 0 | 50 | 0.0 | 0.0 | 1.6 |
| Tennis | 3 | 121 | 75 | 0 | 2 | 0 | 0 | 1 | 0 | 0 | 50 | 0 | 0.0 | 0.8 | 0.0 |
| Triathlon | 1 | 76 | 32 | 0 | 0 | 1 | 0 | 0 | 1 | 0 | 0 | 100 | 0.0 | 0.0 | 3.1 |
| Volleyball | 10 | 193 | 85 | 0 | 2 | 1 | 0 | 0 | 1 | 0 | 0 | 100 | 0.0 | 0.0 | 1.2 |
| Weightlifting | 17 | 197 | 42 | 2 | 2 | 2 | 1 | 2 | 1 | 50 | 100 | 50 | 5.9 | 1.0 | 2.4 |
| Wrestling | 3 | 257 | 89 | 0 | 1 | 1 | 0 | 1 | 1 | 0 | 100 | 100 | 0.0 | 0.4 | 1.1 |
| Others: | 42 | 899 | 344 | 0 | 0 | 0 | 0 | 0 | 0 | 0 | 0 | 0 | 0.0 | 0.0 | 0.0 |
| **Total:** | **611** | **7753** | **2910** | **7** | **56** | **37** | **1** | **27** | **24** | **14** | **48** | **65** | **0.2** | **0.3** | **0.8** |
